# Supplementary material for: Improved survival after laparoscopic compared to open gastrectomy for advanced gastric cancer: a Swedish population-based cohort study
Source: PubMed Central journal article supplement (PMC10115725; doi:10.1007/s10120-023-01371-8), 2023-02-19
Supplement: 10120_2023_1371_MOESM1_ESM.pdf [file 10120_2023_1371_MOESM1_ESM.pdf]

## **Improved survival after laparoscopic compared to open gastrectomy for advanced gastric cancer: a Swedish population-based cohort study**

Andrianos Tsekrekos MD, Laura E. Vossen PhD, Lars Lundell MD, PhD, Martin Jeremiasen MD, PhD, Erik Johnsson MD, PhD, Jakob Hedberg MD, PhD, David Edholm, MD, PhD, Fredrik Klevebro MD, PhD, Magnus Nilsson MD, PhD, Ioannis Rouvelas MD, PhD

**Corresponding author:**

Andrianos Tsekrekos

Department of Upper Abdominal Surgery, Karolinska University Hospital & Division of Surgery, Department of Clinical Science, Intervention and Technology (CLINTEC), Karolinska Institutet Hälsovägen 13, 141 57 Huddinge, Stockholm, Sweden

E-mail address: [andrianos.tsekrekos@ki.se](mailto:andrianos.tsekrekos@ki.se)

| <b>Supplementary Table 1</b> Crude and adjusted odds ratio estimates for postoperative complications* |                  |                    |          |
|-------------------------------------------------------------------------------------------------------|------------------|--------------------|----------|
|                                                                                                       | OG<br>OR         | LG<br>OR (95% CI)  | <i>p</i> |
| Overall complications – CD grade $\geq$ II                                                            |                  |                    |          |
| Crude                                                                                                 | 1.00 (reference) | 0.99 (0.71 – 1.37) | 0.94     |
| Adjusted                                                                                              | 1.00 (reference) | 1.07 (0.76 – 1.52) | 0.68     |
| Severe complications – CD grade $\geq$ III                                                            |                  |                    |          |
| Crude                                                                                                 | 1.00 (reference) | 0.85 (0.57 – 1.27) | 0.44     |
| Adjusted                                                                                              | 1.00 (reference) | 0.93 (0.61 – 1.42) | 0.75     |
| Surgical complications                                                                                |                  |                    |          |
| Crude                                                                                                 | 1.00 (reference) | 1.06 (0.71 – 1.57) | 0.79     |
| Adjusted                                                                                              | 1.00 (reference) | 1.15 (0.76 – 1.74) | 0.51     |

|                                 |                  |                    |      |
|---------------------------------|------------------|--------------------|------|
| Reoperation                     |                  |                    |      |
| Crude                           | 1.00 (reference) | 1.19 (0.70 – 2.01) | 0.51 |
| Adjusted                        | 1.00 (reference) | 1.31 (0.76 – 2.25) | 0.32 |
| Anastomotic leakage             |                  |                    |      |
| Crude                           | 1.00 (reference) | 0.85 (0.45 – 1.56) | 0.60 |
| Adjusted                        | 1.00 (reference) | 1.00 (0.51 – 1.90) | 1.00 |
| Pancreatic fistula/pancreatitis |                  |                    |      |
| Crude                           | 1.00 (reference) | 1.56 (0.46 – 5.45) | 0.47 |
| Adjusted                        | 1.00 (reference) | 2.06 (0.57 – 7.89) | 0.27 |
| Wound complications             |                  |                    |      |
| Crude                           | 1.00 (reference) | 0.54 (0.19 – 1.37) | 0.21 |
| Adjusted                        | 1.00 (reference) | 0.53 (0.18 – 1.37) | 0.21 |
| Non-surgical complications      |                  |                    |      |
| Crude                           | 1.00 (reference) | 1.17 (0.77 – 1.80) | 0.46 |
| Adjusted                        | 1.00 (reference) | 1.25 (0.80 – 1.95) | 0.33 |
| Cardiovascular                  |                  |                    |      |
| Crude                           | 1.00 (reference) | 0.76 (0.32 – 1.74) | 0.53 |
| Adjusted                        | 1.00 (reference) | 0.77 (0.31 – 1.81) | 0.55 |
| Pulmonary                       |                  |                    |      |
| Crude                           | 1.00 (reference) | 1.29 (0.80 – 2.10) | 0.30 |
| Adjusted                        | 1.00 (reference) | 1.40 (0.84 – 2.34) | 0.20 |
| Thromboembolic                  |                  |                    |      |
| Crude                           | 1.00 (reference) | 0.70 (0.24 – 1.85) | 0.48 |
| Adjusted                        | 1.00 (reference) | 0.73 (0.24 – 1.98) | 0.54 |

*OG* open gastrectomy, *LG* laparoscopic gastrectomy, *OR* odds ratio, *CI* confidence interval, *CD* Clavien-Dindo

\* Univariable logistic regression and multivariable logistic regression model adjusted for age, sex, ASA (American Society of Anesthesiologists) score, clinical TNM stage, extent of gastrectomy and neoadjuvant treatment.
